# Supplementary material for: Powassan Virus Infections: A Systematic Review of Published Cases
Source: MDPI journal article supplement (doi:10.3390/tropicalmed8120508), 2023-11-26
Supplement: s1 [file s1]

Supplementary Table S2: Evaluation of the quality of studies fulfilling the inclusion criteria by the Murad scale[13]. Q1-Q6 are referring to the questions described in Supplementary Table S1.

| 1st author, year     | Selection | Ascertainment |     | Causality |     | Reporting | Total |
|----------------------|-----------|---------------|-----|-----------|-----|-----------|-------|
|                      | Q1        | Q2            | Q3  | Q4        | Q5  | Q6        |       |
| McLean, 1959[2]      | Yes       | Yes           | Yes | Yes       | Yes | Yes       | 6     |
| Goldfield, 1973[18]  | Yes       | Yes           | Yes | Yes       | Yes | Yes       | 6     |
| Smith, 1974[19]      | Yes       | Yes           | Yes | Yes       | Yes | Yes       | 6     |
| Rossier, 1974[20]    | Yes       | Yes           | No  | Yes       | Yes | Yes       | 5     |
| Wilson, 1979[21]     | Yes       | Yes           | Yes | Yes       | Yes | Yes       | 6     |
| Partington, 1980[22] | Yes       | Yes           | Yes | Yes       | Yes | Yes       | 6     |
| Embil, 1983[23]      | Yes       | Yes           | Yes | Yes       | Yes | Yes       | 6     |
| Fitch, 1990[24]      | Yes       | Yes           | Yes | Yes       | Yes | Yes       | 6     |
| Gholam, 1999[25]     | Yes       | Yes           | Yes | Yes       | Yes | Yes       | 6     |
| Courtney, 2001[26]   | Yes       | Yes           | Yes | Yes       | Yes | Yes       | 6     |
| Lessell, 2003[27]    | Yes       | Yes           | Yes | Yes       | Yes | Yes       | 6     |
| Hinten, 2008[6]      | Yes       | Yes           | Yes | Yes       | No  | Yes       | 5     |
| Tavakoli, 2009[28]   | Yes       | Yes           | Yes | Yes       | Yes | Yes       | 6     |
| Trépanier, 2010[29]  | Yes       | Yes           | Yes | Yes       | Yes | Yes       | 6     |
| Hicar, 2011[7]       | Yes       | Yes           | Yes | Yes       | Yes | Yes       | 6     |
| Raval, 2012[30]      | Yes       | Yes           | Yes | Yes       | Yes | Yes       | 6     |
| Choi, 2012[31]       | Yes       | Yes           | Yes | Yes       | Yes | Yes       | 6     |
| Birge, 2012[4]       | Yes       | Yes           | Yes | Yes       | Yes | Yes       | 6     |
| Sung, 2013[32]       | Yes       | Yes           | Yes | Yes       | Yes | Yes       | 6     |
| Piantadosi, 2016[33] | Yes       | Yes           | Yes | Yes       | Yes | Yes       | 6     |
| Cavanaugh, 2017[34]  | Yes       | Yes           | Yes | Yes       | Yes | Yes       | 6     |
| Tutolo, 2017[35]     | Yes       | Yes           | Yes | Yes       | Yes | Yes       | 6     |
| Mittal, 2017[36]     | Yes       | Yes           | Yes | Yes       | Yes | Yes       | 6     |
| Sanderson, 2018[37]  | Yes       | Yes           | Yes | Yes       | Yes | Yes       | 6     |
| Solomon, 2018[38]    | Yes       | Yes           | Yes | Yes       | Yes | Yes       | 6     |
| Patel, 2018[39]      | Yes       | Yes           | Yes | Yes       | Yes | Yes       | 6     |
| Picheca, 2019[40]    | Yes       | Yes           | No  | Yes       | No  | Yes       | 4     |
| Khan, 2019[41]       | Yes       | Yes           | Yes | Yes       | Yes | Yes       | 6     |
| Allgaier, 2019[42]   | Yes       | Yes           | Yes | Yes       | Yes | Yes       | 6     |
| Colman, 2020[43]     | Yes       | Yes           | Yes | Yes       | Yes | Yes       | 6     |
| Koester, 2020[44]    | Yes       | Yes           | Yes | Yes       | Yes | Yes       | 6     |
| Yu, 2020[45]         | Yes       | Yes           | Yes | Yes       | Yes | Yes       | 6     |
| Feder, 2021[46]      | Yes       | Yes           | Yes | Yes       | Yes | Yes       | 6     |
| Pach, 2021[47]       | Yes       | Yes           | Yes | Yes       | Yes | Yes       | 6     |
| Dumic, 2021[48]      | Yes       | Yes           | Yes | Yes       | Yes | Yes       | 6     |
| Dumic, 2021[49]      | Yes       | Yes           | Yes | Yes       | Yes | Yes       | 6     |
| Taylor, 2021[50]     | Yes       | Yes           | Yes | Yes       | Yes | Yes       | 6     |
| Kroopnick, 2021[51]  | Yes       | No            | Yes | Yes       | Yes | Yes       | 5     |
| Nord, 2021[52]       | Yes       | No            | Yes | Yes       | Yes | No        | 4     |
| Bazer, 2022[53]      | Yes       | Yes           | Yes | Yes       | No  | Yes       | 5     |
| Johnson, 2022[54]    | Yes       | Yes           | Yes | Yes       | Yes | Yes       | 6     |
| Kakoullis, 2022[55]  | Yes       | Yes           | Yes | Yes       | Yes | Yes       | 6     |
| Mendoza, 2023[56]    | Yes       | Yes           | Yes | Yes       | Yes | Yes       | 6     |
